# Supplementary material for: Sensitized near-IR luminescence of lanthanide complexes based on push-pull diketone derivatives
Source: Royal Society of Chemistry journal article supplement (doi:10.1039/b915893f), 2009-12-14
Supplement: b915893f.pdf [file b915893f.pdf]

## Supporting Information

# Sensitized Near IR Luminescence of $\text{Ln}^{3+}$ ion in Lanthanide Complexes Based on Push-Pull Diketone Derivatives: Synthesis and Photophysical Behaviors

Nam Seob Baek,<sup>a</sup> Yong Hee Kim,<sup>a</sup> Yu Kyung Eom,<sup>b</sup> Jung Hwan Oh,<sup>b</sup> Hwan Kyu Kim,<sup>\*b</sup>  
Annina Aebischer,<sup>c</sup> Frédéric Gummy,<sup>c</sup> Anne-Sophie Chauvin<sup>c</sup> and Jean-Claude Bünzli<sup>\*c</sup>

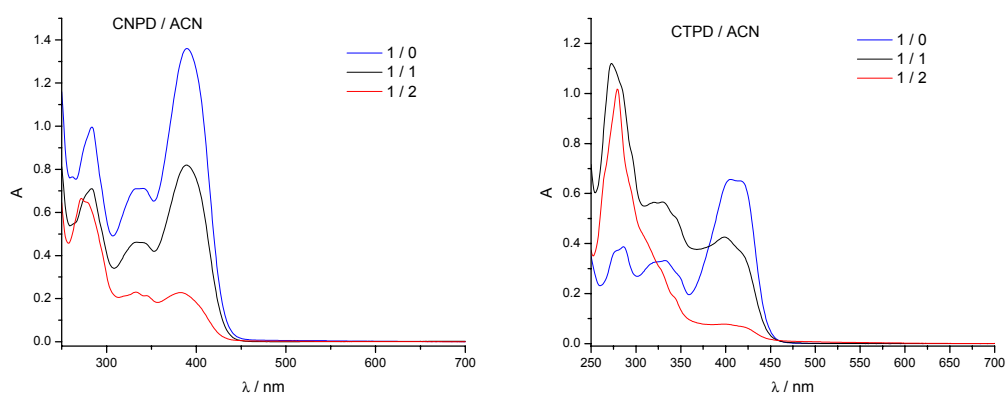

Fig. S1 UV-Vis absorption spectra of CNPD-Na and CTPD-Na as a function of the composition ratio of ligand/sodium ratio (ACN, Conc. =  $2.0 \times 10^{-5}$  M).

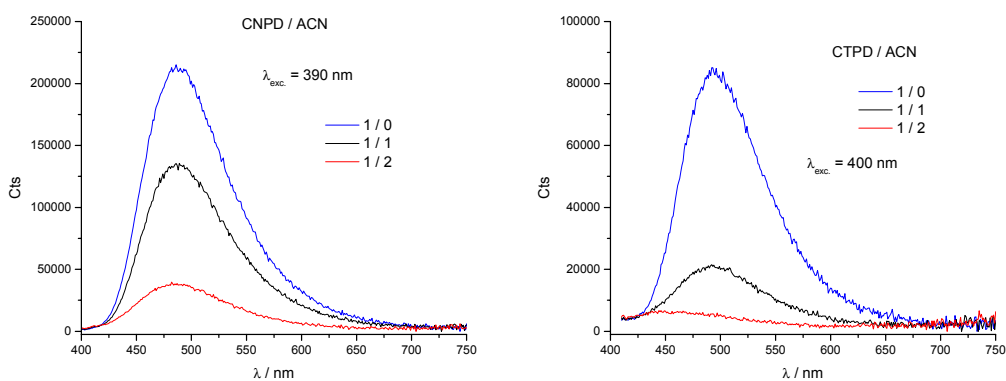

Fig. S2 Photoluminescence spectra of CNPD-Na and CTPD-Na as a function of the composition ratio of ligand/sodium ratio (ACN, Conc. =  $2.0 \times 10^{-5}$  M).

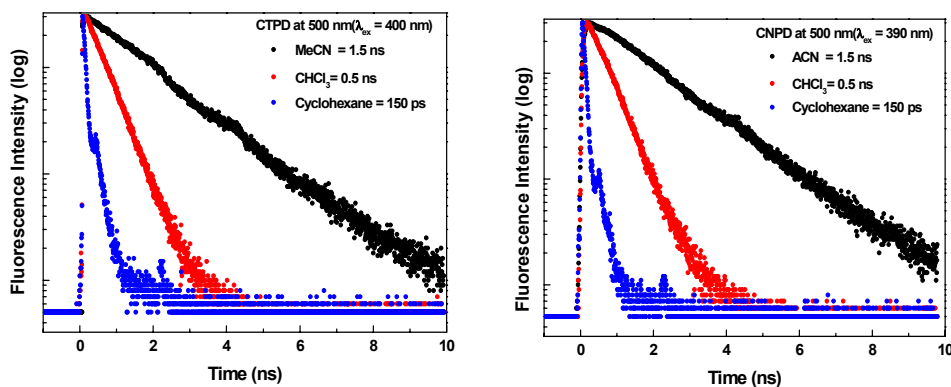

Fig. S3 UV-Vis absorption spectra of CNPD-Na and CTPD-Na (ACN)  $2.0 \times 10^{-5}$  M

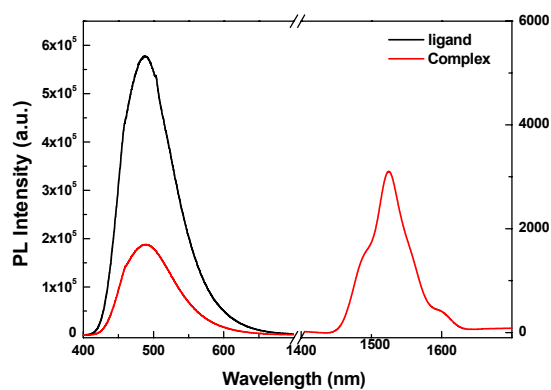

Fig. S4 Near-IR emission spectra of  $\text{Er}^{3+}$ -[CNPD]<sub>3</sub>(tpy) in MeCN ( $\lambda_{ex} = 390$  nm, Conc. =  $2.0 \times 10^{-5}$  M).

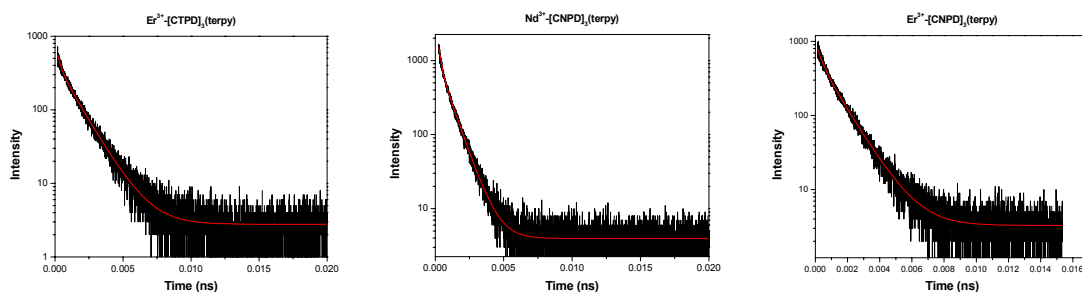

Fig. S5 NIR luminescence decays of [Er(CTPD)<sub>3</sub>(terpy)], [Nd(CNTD)<sub>3</sub>(terpy)], and [Er(CNPD)<sub>3</sub>(terpy)]  $2.0 \times 10^{-5}$  M in MeCN at 10 K and upon excitation at 355 nm with a pulse width of 10 ns.

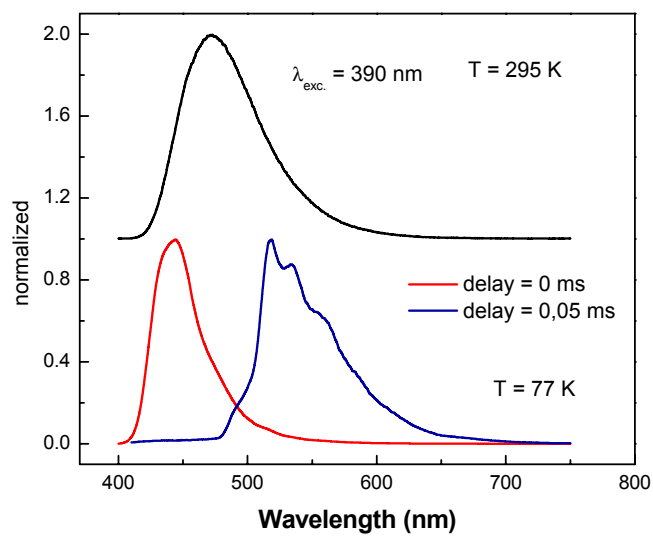

**Fig. S6.** Emission spectra of [Gd(CNPD)<sub>3</sub>(tpy)] :  $2.0 \times 10^{-5}$  M in MeCN at 295 K (Top) and 77 K (Bottom) without and with time delay.
